# Supplementary material for: Reversing the code of a template-directed solid-state synthesis: a bipyridine template that directs a single-crystal-to-single-crystal [2 + 2] photodimerisation of a dicarboxylic acid
Source: Royal Society of Chemistry journal article supplement (doi:10.1039/b510081j), 2005-01-01

# Supplementary Material (ESI) for Chemical Communications  
# This journal is © The Royal Society of Chemistry 2005

---

**Reversing the code of a template-directed solid-state synthesis: a bipyridine template that directs a single-crystal-to-single-crystal [2+2] photodimerisation of a dicarboxylic acid.**

---

**Tomislav Friščić and Leonard R. MacGillivray\***

*Department of Chemistry, University of Iowa, Iowa City, IA, 52242-1294, USA. Fax: 319-335-1270;  
Tel: 319-335-3504; E-mail: len-macgillivray@uiowa.edu*

## **Supplementary material**

**Figure S1.** <sup>1</sup>H NMR spectrum of photoreacted 2(2,3-nap)·2(fum).

# Supplementary Material (ESI) for Chemical Communications  
# This journal is © The Royal Society of Chemistry 2005

**Figure S1.**  $^1\text{H}$  NMR spectrum of photoreacted 2(2,3-nap)·2(fum).

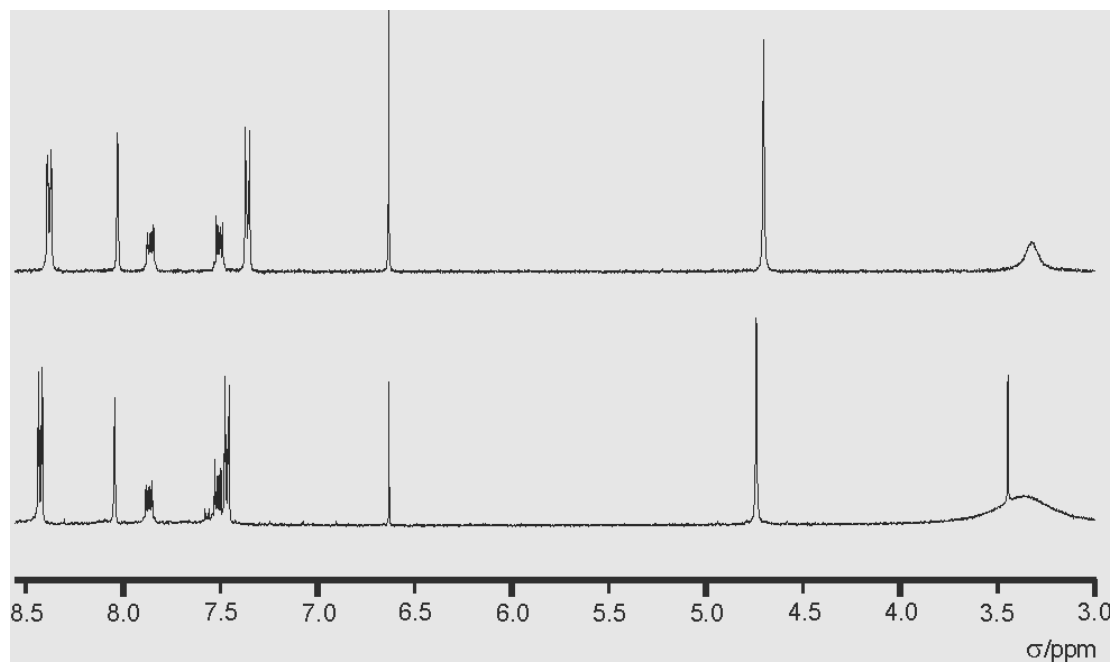

Supplement: b510081j.pdf [file b510081j.pdf]
